# Supplementary material
Source: MDPI journal article supplement (https://www.mdpi.com/2076-3298/10/5/88)
Supplement: s1 [file s1]

## Supporting Information for

### How the presence of CO<sub>2</sub> absorption promoters and composition of the choline chloride/amine/molecular solvent mixtures influence its thermophysical properties and ability to absorb carbon dioxide

Olga V. Kazarina,<sup>\*a,b,c</sup> Anna A. Golovacheva,<sup>b,c</sup> Zakhar A. Markin,<sup>c</sup> Anton N. Petukhov,<sup>b,c</sup> Alexander S. Kazarin,<sup>c</sup> Artem A. Atlaskin,<sup>b</sup> Tatyana S. Sazanova,<sup>a,b</sup> Artyom N. Markov,<sup>c</sup> Alexander A. Kapinos,<sup>b,c</sup> Alexandra V. Barysheva,<sup>c</sup> Sergey S. Suvorov,<sup>c</sup> Egor S. Dokin,<sup>c</sup> Ilya V. Vorotyntsev<sup>b</sup> and Andrey V. Vorotyntsev<sup>c</sup>.

<sup>a</sup>Nizhny Novgorod State Technical University n.a. R.E. Alekseev, 24 Minina Street, Nizhny Novgorod, 603950, Russian Federation

<sup>b</sup>Mendeleev University of Chemical Technology, 9 Miusskaya square, Moscow 125047, Russian Federation.

<sup>c</sup>Lobachevsky State University of Nizhny Novgorod, Chemical Engineering Laboratory, Research Institute for Chemistry, Gagarina Avenue 23, Nizhny Novgorod 603950, Russian Federation.

\*e-mail: olga\_kazarina@list.ru

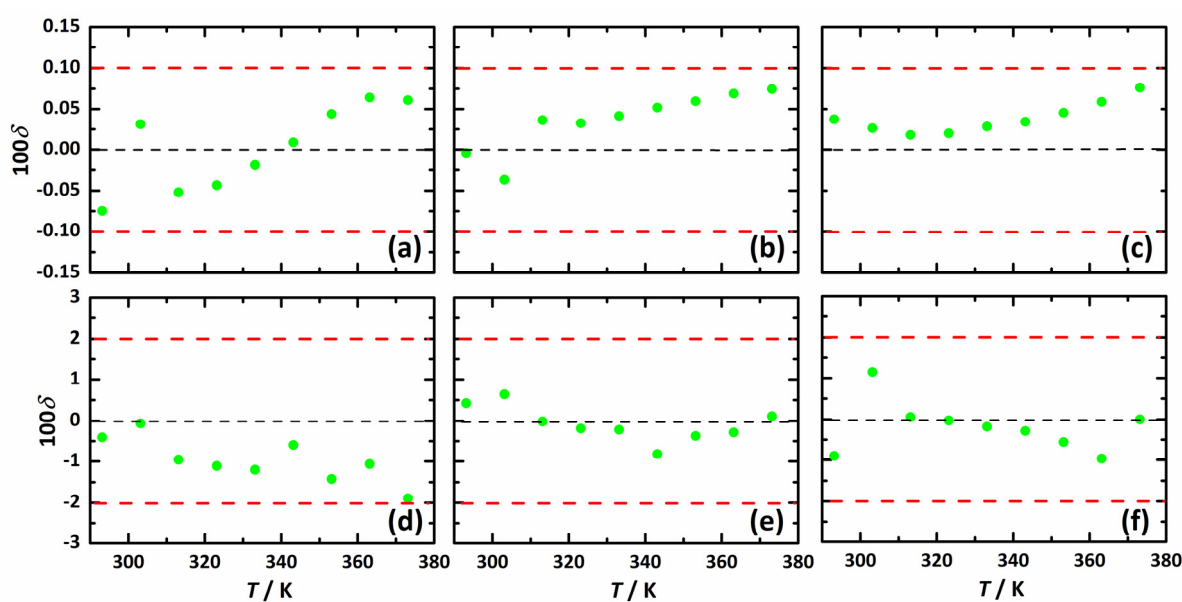

**Figure S1.** Relative deviation ( $\delta = (Y^{\text{exp}} - Y^{\text{fit}})/Y^{\text{fit}}$ ) of experimentally obtained data ( $Y^{\text{exp}}$ ) from the fit ( $Y^{\text{fit}}$ ) of density (a-c) and viscosity (d-f) for the calibration standards N7.5 (a, d), N26 (b, e) and N415 (c, f) within the temperature range of  $T = (293.15 \text{ to } 373.15) \text{ K}$ . Fit data ( $Y^{\text{fit}}$ ) were obtained by fitting the density and viscosity data provided by the supplier for the delivered oil batches with eqs. 3 and 8, respectively. Black dash line indicates zero; red dash lines correspond to the estimated uncertainties, see manuscript.

**Table S1. Remaining Water Content ( $w_{H_2O}$ )<sup>a</sup> in the Mixtures of Row-I and Row-II<sup>b</sup>**

| Series I   |                  | Series II     |                  |
|------------|------------------|---------------|------------------|
| System     | $w_{H_2O}$ (ppm) | System        | $w_{H_2O}$ (ppm) |
| I-MEA/EG   | 809 ± 34         | II-MEA/EG     | 735 ± 13         |
| I-DEA/EG   | 567±28           | II-MEA/EG/TMG | 678 ± 22         |
| I-EDA/EG   | 765 ± 41         | II-MEA/EG/DBU | 548 ± 31         |
| I-TEA/EG   | 602 ± 17         | II-MEA/EG/PP  | 604 ± 24         |
| I-MEA/DMSO | 378 ± 35         |               |                  |

<sup>a</sup>An average of 7-9 measurements with a standard deviation; mass fraction ( $w_{H_2O} = m_{H_2O}/m_{sample}$ ).<sup>b</sup> Standard uncertainty for mole fraction estimation is  $u(x_i) = 0.001$ .

**Table S2. CO<sub>2</sub> absorption capacity ( $m_{CO_2}$ ) of the 15 and 30 wt.% aqueous MEA solution and NH<sub>3</sub> absorption capacity of the DES composed of NH<sub>4</sub>SCN and glycerol mixed in a mole ratio of 2:3 at temperatures ( $T$ ) and  $P = 0.1$  MPa.<sup>a</sup>**

| Absorption capacity <sup>b</sup>                                             | $m_{gas}$ | $P$   | $T$    | Ref.          | $m_{CO_2}$ <sup>c,d</sup> | Average <sup>e,d</sup> |
|------------------------------------------------------------------------------|-----------|-------|--------|---------------|---------------------------|------------------------|
| <b>15% aqueous MEA solution + CO<sub>2</sub></b>                             |           |       |        |               |                           |                        |
| 504.6 g <sub>CO<sub>2</sub></sub> /kg <sub>MEA</sub>                         | 1.719     | 101.3 | 298.15 | <sup>1f</sup> | 1.73                      |                        |
| 0.742 mol <sub>CO<sub>2</sub></sub> /mol <sub>MEA</sub> (2.5 N) <sup>e</sup> | 1.82      | 100   | 298.15 | <sup>2g</sup> |                           |                        |
| 0.673 mol <sub>CO<sub>2</sub></sub> /mol <sub>MEA</sub> (2.5 N) <sup>e</sup> | 1.65      | 100   | 313.15 | <sup>2g</sup> | 1.62                      |                        |
| <b>30% aqueous MEA solution + CO<sub>2</sub></b>                             |           |       |        |               |                           |                        |
| 453.0 ± 16.3 g <sub>CO<sub>2</sub></sub> /kg <sub>MEA</sub>                  | 3.1 ± 0.1 | 101.3 | 298.15 | <sup>1f</sup> | 1) 3.07                   |                        |
| 0.663 mol <sub>CO<sub>2</sub></sub> /mol <sub>MEA</sub>                      | 3.25      | 100   | 298.15 | <sup>2g</sup> | 2) 3.04                   | 3.05 ± 0.02            |
| 0.694 mol <sub>CO<sub>2</sub></sub> /mol <sub>MEA</sub>                      | 3.39      | 100   | 298.15 | <sup>3g</sup> | 3) 3.05                   |                        |
| 0.603 mol <sub>CO<sub>2</sub></sub> /mol <sub>MEA</sub>                      | 2.96      | 100   | 313.15 | <sup>2g</sup> | 1) 2.99                   |                        |
| 0.646 mol <sub>CO<sub>2</sub></sub> /mol <sub>MEA</sub>                      | 3.17      | 110   | 313.15 | <sup>3g</sup> | 2) 3.00                   | 2.99 ± 0.01            |
| 0.594 mol <sub>CO<sub>2</sub></sub> /mol <sub>MEA</sub>                      | 2.92      | 101.3 | 313.15 | <sup>4g</sup> | 3) 2.98                   |                        |
| <b>[NH<sub>4</sub>SCN:Gly = 2:3] + NH<sub>3</sub></b>                        |           |       |        |               |                           |                        |
| 10.36 mol <sub>NH<sub>3</sub></sub> /kg <sub>DES</sub>                       | 10.36     | 101.3 | 313.15 | <sup>5f</sup> | 1) 10.41                  |                        |
| 10.35 mol <sub>NH<sub>3</sub></sub> /kg <sub>DES</sub>                       | 10.35     | 100.0 | 313.15 | <sup>6f</sup> | 2) 10.36                  | 10.38 ± 0.03           |
|                                                                              |           |       |        |               | 3) 10.38                  |                        |

<sup>a</sup>Units are mol<sub>gas</sub>/kg<sub>solution</sub> for  $m_{CO_2}$ ; K for  $T$ ; MPa for  $P$ ; for the data obtained in the present work, standard uncertainties are  $u(P) = 100$  Pa for  $P$ ,  $u(T) = 0.02$  K for  $T$  and  $u(100w_{MEA}) = 0.01$  for  $100w_{MEA}$ . <sup>b</sup>Units provided in the original papers; <sup>c</sup>This work. <sup>d</sup>The relative expanded uncertainty for absorption capacity is  $U_r(m_{CO_2}) = 0.05$  (0.95 level of confidence) for the data obtained in the present work. <sup>e</sup>The actual mass fraction is 15.25 wt %. <sup>f</sup>Results of gravimetric measurements. <sup>g</sup>Results of volumetric measurements.

**Table S3. Density ( $\rho$ ) of the mixtures composed of MEA (1), EG (2) and ChCl (3) with  $x_1 = 0.667$ ,  $x_2 = 0.222$ , and  $x_3 = 0.111$  for Series I and  $x_1 = 0.222$ ,  $x_2 = 0.667$ , and  $x_3 = 0.111$  additionally containing 5 wt.% of such additives as TMG, H<sub>2</sub>O, DBU and PP for Series II at Temperatures ( $T$ ) and  $P = 0.1$  MPa.<sup>a</sup>**

| $T / \text{K}$             | 283.15                                                                                                                   | 288.15  | 293.15  | 298.15  | 303.15  | 308.15  | 313.15  | 318.15  | 323.15  | 328.15  | 333.15  | 338.15  | 343.15  | 348.15  | 353.15  |
|----------------------------|--------------------------------------------------------------------------------------------------------------------------|---------|---------|---------|---------|---------|---------|---------|---------|---------|---------|---------|---------|---------|---------|
| System                     | <b>Series I: <math>x_1 = 0.667</math>, <math>x_2 = 0.222</math>, and <math>x_3 = 0.111</math></b>                        |         |         |         |         |         |         |         |         |         |         |         |         |         |         |
| I-MEA/EG                   |                                                                                                                          |         | 1.10139 | 1.09812 | 1.09485 | 1.0916  | 1.08835 | 1.08508 | 1.08183 | 1.07858 | 1.07536 | 1.07207 | 1.06882 | 1.06556 | 1.06225 |
| I-DEA/EG                   | 1.11275                                                                                                                  | 1.10852 | 1.10544 | 1.10242 | 1.09938 | 1.09631 | 1.09329 | 1.09024 | 1.08716 | 1.08409 | 1.08099 | 1.07787 | 1.07471 | 1.07053 | 1.06733 |
| I-EDA/EG                   | 1.01614                                                                                                                  | 1.01166 | 1.00759 | 1.00357 | 0.99955 | 0.99554 | 0.99152 | 0.98749 | 0.98347 | 0.97945 | 0.97544 | 0.9714  | 0.96738 | 0.96335 | 0.95965 |
| I-TEA/EG                   | 1.07216                                                                                                                  | 1.06745 | 1.06345 | 1.06057 | 1.05654 | 1.05264 | 1.04875 | 1.04488 | 1.04103 | 1.03718 | 1.03334 | 1.0295  | 1.02565 | 1.02179 | 1.01795 |
| I-MEA/DMSO                 | 1.06064                                                                                                                  | 1.05684 | 1.05332 | 1.04982 | 1.04631 | 1.04282 | 1.03932 | 1.03581 | 1.03231 | 1.02881 | 1.02531 | 1.0218  | 1.01828 | 1.01476 | --      |
| I-MEA/H <sub>2</sub> O     | 1.13142                                                                                                                  | 1.12876 | 1.12602 | 1.12332 | 1.12058 | 1.11778 | 1.11497 | 1.11215 | 1.10937 | 1.10613 | 1.10323 | 1.10032 | 1.09741 | 1.09445 | 1.09151 |
| System                     | <b>Series II: <math>x_1 = 0.222</math>, <math>x_2 = 0.667</math>, and <math>x_3 = 0.111</math> + 5 wt.% of additives</b> |         |         |         |         |         |         |         |         |         |         |         |         |         |         |
| II-MEA/EG                  |                                                                                                                          |         | 1.10139 | 1.09812 | 1.09485 | 1.0916  | 1.08835 | 1.08508 | 1.08183 | 1.07858 | 1.07536 | 1.07207 | 1.06882 | 1.06556 | 1.06225 |
| II-MEA/EG/TMG              | 1.10345                                                                                                                  | 1.09994 | 1.09649 | 1.09307 | 1.08967 | 1.08624 | 1.08282 | 1.07939 | 1.07639 | 1.07377 | 1.07039 | 1.06701 | 1.06354 | 1.06009 | 1.05659 |
| II-MEA/EG/H <sub>2</sub> O | 1.10481                                                                                                                  | 1.10147 | 1.09826 | 1.09501 | 1.09176 | 1.08851 | 1.08525 | 1.08198 | 1.0787  | 1.07543 | 1.07217 | 1.06888 | 1.06558 | 1.06229 | 1.05893 |
| II-MEA/EG/DBU              | 1.10655                                                                                                                  | 1.10273 | 1.09933 | 1.09597 | 1.09261 | 1.08926 | 1.08587 | 1.08249 | 1.07912 | 1.07579 | 1.07245 | 1.06913 | 1.06581 | 1.06248 | 1.05914 |
| II-MEA/EG/PP               | 1.10541                                                                                                                  | 1.10116 | 1.09786 | 1.09459 | 1.0913  | 1.08799 | 1.08469 | 1.08139 | 1.07806 | 1.07478 | 1.07146 | 1.06817 | 1.0649  | 1.06155 | 1.05818 |

<sup>a</sup>Standard uncertainties are  $u(x_i) = 0.001$ ,  $u(T) = 0.01$  K and  $u(P) = 10$  kPa. The relative expanded uncertainty is  $U_r(\rho) = 0.001$  (0.95 level of confidence).

**Table S4. Density ( $\rho$ ) of the mixtures composed of MEA (1), EG (2) and ChCl (3) with  $x_1 = 0.667$ ,  $x_2 = 0.222$ , and  $x_3 = 0.111$  for Series I and  $x_1 = 0.222$ ,  $x_2 = 0.667$ , and  $x_3 = 0.111$  additionally containing 5 wt.% of such additives as TMG, H<sub>2</sub>O, DBU and PP for Series II at Temperatures ( $T$ ) and  $P = 0.1$  MPa after complete CO<sub>2</sub> saturation.<sup>a</sup>**

| $T / \text{K}$             | 283.15                                                                                                                   | 288.15  | 293.15  | 298.15  | 303.15  | 308.15  | 313.15  | 318.15  | 323.15  | 328.15  | 333.15  | 338.15  |
|----------------------------|--------------------------------------------------------------------------------------------------------------------------|---------|---------|---------|---------|---------|---------|---------|---------|---------|---------|---------|
| System                     | <b>Series I: <math>x_1 = 0.667</math>, <math>x_2 = 0.222</math>, and <math>x_3 = 0.111</math></b>                        |         |         |         |         |         |         |         |         |         |         |         |
| I-MEA/EG                   |                                                                                                                          |         | 1.21982 | 1.21782 | 1.21488 | 1.21188 | 1.20896 | 1.20615 |         |         |         |         |
| I-DEA/EG                   |                                                                                                                          | 1.2275  | 1.2244  | 1.2213  | 1.2181  | 1.2148  | 1.2117  | 1.2085  | 1.2069  |         |         |         |
| I-TEA/EG                   | 1.21062                                                                                                                  | 1.20777 | 1.20484 | 1.20195 | 1.19902 | 1.19602 | 1.19302 | 1.19    |         |         |         |         |
| I-MEA/DMSO                 | 1.23118                                                                                                                  | 1.22809 | 1.22484 | 1.22158 | 1.2183  | 1.21491 | 1.21172 | 1.20863 | 1.20541 | 1.20211 |         |         |
| I-MEA/H <sub>2</sub> O     | 1.23857                                                                                                                  | 1.23583 | 1.2329  | 1.22993 | 1.22688 | 1.224   | 1.22132 | 1.21853 | 1.21583 | 1.2131  | 1.21034 | 1.20766 |
| System                     | <b>Series II: <math>x_1 = 0.222</math>, <math>x_2 = 0.667</math>, and <math>x_3 = 0.111 + 5</math> wt.% of additives</b> |         |         |         |         |         |         |         |         |         |         |         |
| II-MEA/EG                  |                                                                                                                          |         | 1.16141 | 1.15832 | 1.15525 | 1.15214 | 1.14904 | 1.14588 |         |         |         |         |
| II-MEA/EG/TMG              | 1.16498                                                                                                                  | 1.16227 | 1.15915 | 1.15605 | 1.15291 | 1.14975 | 1.14653 |         |         |         |         |         |
| II-MEA/EG/H <sub>2</sub> O | 1.1658                                                                                                                   | 1.16283 | 1.1598  | 1.15671 | 1.15362 | 1.15046 | 1.14689 |         |         |         |         |         |
| II-MEA/EG/DBU              | 1.16785                                                                                                                  | 1.16369 | 1.16054 | 1.15924 | 1.15623 | 1.15313 | 1.15001 | 1.14685 |         |         |         |         |
| II-MEA/EG/PP               | 1.17944                                                                                                                  | 1.17575 | 1.17272 | 1.16966 | 1.16656 | 1.16344 | 1.16029 | 1.15679 |         |         |         |         |

<sup>a</sup>Standard uncertainties are  $u(x_i) = 0.001$ ,  $u(T) = 0.01$  K and  $u(P) = 10$  kPa. The relative expanded uncertainty is  $U_r(\rho) = 0.001$  (0.95 level of confidence).

**Table S5. Viscosity ( $\eta$ ) of the mixtures composed of MEA (1), EG (2) and ChCl (3) with  $x_1 = 0.667$ ,  $x_2 = 0.222$ , and  $x_3 = 0.111$  for Series I and  $x_1 = 0.222$ ,  $x_2 = 0.667$ , and  $x_3 = 0.111$  additionally containing 5 wt.% of such additives as TMG, H<sub>2</sub>O, DBU and PP for Series II at Temperatures ( $T$ ) and  $P = 0.1$  MPa.<sup>a</sup>**

| $T / \text{K}$             | 283.15                                                                                                                   | 288.15 | 293.15 | 298.15 | 303.15 | 308.15 | 313.15 | 318.15 | 323.15 | 328.15 | 333.15 | 338.15 | 343.15 | 348.15 | 353.15 |
|----------------------------|--------------------------------------------------------------------------------------------------------------------------|--------|--------|--------|--------|--------|--------|--------|--------|--------|--------|--------|--------|--------|--------|
| System                     | <b>Series I: <math>x_1 = 0.667</math>, <math>x_2 = 0.222</math>, and <math>x_3 = 0.111</math></b>                        |        |        |        |        |        |        |        |        |        |        |        |        |        |        |
| I-MEA/EG                   |                                                                                                                          |        | 55.2   | 42.3   | 33.1   | 26.1   | 20.9   | 17.0   | 14.0   | 11.6   | 9.81   | 8.32   | 7.14   | 6.18   | 5.40   |
| I-DEA/EG                   | 852                                                                                                                      | 576    | 395    | 276    | 197    | 144    | 107    | 80.8   | 62.1   | 48.4   | 38.4   | 30.7   | 24.9   | 20.5   | 17.0   |
| I-EDA/EG                   | 36.6                                                                                                                     | 27.9   | 21.4   | 16.8   | 13.4   | 10.9   | 8.91   | 7.46   | 6.25   | 5.36   | 4.59   | 4.01   | 3.52   | 3.10   | 2.70   |
| I-TEA/EG                   | 39.6                                                                                                                     | 30.6   | 23.7   | 18.6   | 15.0   | 12.3   | 10.1   | 8.51   | 7.17   | 6.19   | 5.32   | 4.68   | 4.11   | 3.64   | 3.23   |
| I-MEA/DMSO                 | 81.7                                                                                                                     | 60.2   | 44.7   | 34.1   | 26.6   | 21.0   | 16.8   | 13.7   | 11.3   | 9.40   | 7.88   | 6.76   | 5.81   | 5.04   |        |
| I-MEA/H <sub>2</sub> O     | 860                                                                                                                      | 574    | 394    | 277    | 200    | 147    | 110    | 84.5   | 65.8   | 52.1   | 41.9   | 33.9   | 27.9   | 23.2   | 19.5   |
| System                     | <b>Series II: <math>x_1 = 0.222</math>, <math>x_2 = 0.667</math>, and <math>x_3 = 0.111</math> + 5 wt.% of additives</b> |        |        |        |        |        |        |        |        |        |        |        |        |        |        |
| II-MEA/EG                  |                                                                                                                          |        | 37.0   | 29.7   | 24.1   | 19.8   | 16.4   | 13.7   | 11.6   | 9.89   | 8.53   | 7.38   | 6.46   | 5.69   | 5.01   |
| II-MEA/EG/TMG              | 70.8                                                                                                                     | 53.9   | 41.4   | 32.6   | 26.1   | 21.1   | 17.3   | 14.3   | 12.3   | 10.4   | 8.87   | 7.62   | 6.61   | 5.78   | 5.05   |
| II-MEA/EG/H <sub>2</sub> O | 45.2                                                                                                                     | 35.8   | 28.3   | 22.7   | 18.5   | 15.2   | 12.6   | 10.7   | 9.00   | 7.76   | 6.67   | 5.84   | 5.12   | 4.52   | 3.99   |
| II-MEA/EG/DBU              | 74.4                                                                                                                     | 56.9   | 43.8   | 34.6   | 27.8   | 22.5   | 18.4   | 15.3   | 12.8   | 10.8   | 9.26   | 7.96   | 6.91   | 6.05   | 5.29   |
| II-MEA/EG/PP               | 79.5                                                                                                                     | 60.9   | 46.8   | 36.9   | 29.5   | 23.8   | 19.4   | 16.0   | 13.4   | 11.3   | 9.62   | 8.24   | 7.13   | 6.22   | 5.47   |

<sup>a</sup>Standard uncertainties are  $u(x_i) = 0.001$ ,  $u(T) = 0.01$  K and  $u(P) = 10$  kPa. The relative expanded uncertainty is  $U_r(\eta) = 0.02$  (0.95 level of confidence).

**Table S6. Viscosity ( $\eta$ ) of the mixtures composed of MEA (1), EG (2) and ChCl (3) with  $x_1 = 0.667$ ,  $x_2 = 0.222$ , and  $x_3 = 0.111$  for Series I and  $x_1 = 0.222$ ,  $x_2 = 0.667$ , and  $x_3 = 0.111$  additionally containing 5 wt.% of such additives as TMG, H<sub>2</sub>O, DBU and PP for Series II at Temperatures ( $T$ ) and  $P = 0.1$  MPa after complete CO<sub>2</sub> saturation.<sup>a</sup>**

| $T / \text{K}$             | 283.15                                                                                                                   | 288.15 | 293.15 | 298.15 | 303.15 | 308.15 | 313.15 | 318.15 | 323.15 | 328.15 | 333.15 | 338.15 |
|----------------------------|--------------------------------------------------------------------------------------------------------------------------|--------|--------|--------|--------|--------|--------|--------|--------|--------|--------|--------|
| System                     | <b>Series I: <math>x_1 = 0.667</math>, <math>x_2 = 0.222</math>, and <math>x_3 = 0.111</math></b>                        |        |        |        |        |        |        |        |        |        |        |        |
| I-MEA/EG                   |                                                                                                                          |        | 4384   | 2865   | 1938   | 1325   | 917    | 662    |        |        |        |        |
| I-DEA/EG                   |                                                                                                                          | 12724  | 7892   | 5021   | 3293   | 2211   | 1503   | 1066   | 799    |        |        |        |
| I-TEA/EG                   | 20111                                                                                                                    | 12192  | 6878   | 4300   | 2762   | 1826   | 1224   | 857    | 602    | 438    |        |        |
| I-MEA/DMSO                 | 17085                                                                                                                    | 9639   | 5955   | 3742   | 2477   | 1665   | 1135   | 808    | 576    | 425    | 316    | 239    |
| I-MEA/H <sub>2</sub> O     | 5201                                                                                                                     | 3170   | 1968   | 1385   | 998    | 735    | 552    | 423    | 329    |        |        |        |
| System                     | <b>Series II: <math>x_1 = 0.222</math>, <math>x_2 = 0.667</math>, and <math>x_3 = 0.111</math> + 5 wt.% of additives</b> |        |        |        |        |        |        |        |        |        |        |        |
| II-MEA/EG                  |                                                                                                                          |        | 111    | 85.4   | 66.7   | 52.6   | 42.0   | 33.9   |        |        |        |        |
| II-MEA/EG/TMG              | 246                                                                                                                      | 180    | 133    | 101    | 78.3   | 61.3   | 48.6   |        |        |        |        |        |
| II-MEA/EG/H <sub>2</sub> O | 138                                                                                                                      | 104    | 78.4   | 60.7   | 47.9   | 38.2   | 30.9   |        |        |        |        |        |
| II-MEA/EG/DBU              | 257                                                                                                                      | 188    | 138    | 105    | 81.5   | 63.7   | 50.5   | 40.7   |        |        |        |        |
| II-MEA/EG/PP               | 371                                                                                                                      | 268    | 196    | 147    | 112    | 86.9   | 68.2   | 54.6   |        |        |        |        |

<sup>a</sup>Standard uncertainties are  $u(x_i) = 0.001$ ,  $u(T) = 0.01$  K and  $u(P) = 10$  kPa. The relative expanded uncertainty is  $U_r(\eta) = 0.02$  (0.95 level of confidence).

**Table S7. Absorption capacity,  $m_{\text{CO}_2}$ , and amine efficiency,  $c_{\text{CO}_2}$ , for the mixtures composed of MEA (1), EG (2) and ChCl (3) with  $x_1 = 0.667$ ,  $x_2 = 0.222$ , and  $x_3 = 0.111$  for Series I and  $x_1 = 0.222$ ,  $x_2 = 0.667$ , and  $x_3 = 0.111$  additionally containing 5 wt.% of such additives as TMG, H<sub>2</sub>O, DBU and PP for Series II at  $T = 313.15$  K and pressure  $P = 0.1$  MPa<sup>a</sup>**

| Series I               |                     |                     | Series II                  |                     |                     |
|------------------------|---------------------|---------------------|----------------------------|---------------------|---------------------|
| System                 | $m_{\text{CO}_2}^b$ | $c_{\text{CO}_2}^b$ | System                     | $m_{\text{CO}_2}^b$ | $c_{\text{CO}_2}^b$ |
| I-MEA/EG               | 4.62                | 0.485               | II-MEA/EG                  | 1.77                | 0.560               |
| I-DEA/EG               | 3.25                | 0.484               | II-MEA/EG/TMG              | 1.83                | 0.610               |
| I-EDA/EG               | 6.41                | 0.667               | II-MEA/EG/H <sub>2</sub> O | 1.73                | 0.574               |
| I-TEA/EG               | 0.411               | 0.0794              | II-MEA/EG/DBU              | 1.84                | 0.614               |
| I-MEA/DMSO             | 4.89                | 0.539               | II-MEA/EG/PP               | 2.20                | 0.731               |
| I-MEA/H <sub>2</sub> O | 5.59                | 0.505               |                            |                     |                     |

<sup>a</sup>Standard uncertainties are  $u(P) = 100$  Pa for  $P$ ,  $u(T) = 0.02$  K for  $T$  and  $u(x_i) = 0.001$  for  $x_i$ ; the relative expanded uncertainties for CO<sub>2</sub> absorbing capacity and efficiency are  $U_r(m_{\text{CO}_2}) = 0.05$  and  $U_r(c_{\text{CO}_2}) = 0.05$  (0.95 level of confidence), respectively. <sup>b</sup>Units are  $\text{mol}_{\text{CO}_2} \times \text{kg}_{\text{solution}}^{-1}$  for  $m_{\text{CO}_2}$  and  $\text{mol}_{\text{CO}_2} \times \text{mol}_{\text{MEA}}^{-1}$  for  $c_{\text{CO}_2}$ .

## References:

- (1) Huertas, J. I.; Gomez, M. D.; Giraldo, N.; Garzón, J. CO<sub>2</sub> Absorbing Capacity of MEA. *J. Chem.* **2015**, *2015*, 965015.
- (2) Lee, J. I.; Otto, F. D.; Mather, A. E. Equilibrium Between Carbon Dioxide and Aqueous Monoethanolamine Solutions. *J Appl Chem Biotechnol* **1976**, *26*, 541–549.
- (3) Jou, F. -Y.; Mather, A. E.; Otto, F. D. The Solubility of CO<sub>2</sub> in a 30 Mass Percent Monoethanolamine Solution. *Can. J. Chem. Eng.* **1995**, *73*, 140–147.
- (4) Shen, K. P.; Li, M. H. Solubility of Carbon Dioxide in Aqueous Mixtures of Monoethanolamine with Methyldiethanolamine. *J. Chem. Eng. Data* **1992**, *37*, 96–100.
- (5) Deng, D.; Gao, B.; Zhang, C.; Duan, X.; Cui, Y.; Ning, J. Investigation of Protic NH<sub>4</sub>SCN-Based Deep Eutectic Solvents as Highly Efficient and Reversible NH<sub>3</sub> Absorbents. *Chem. Eng. J.* **2019**, *358*, 936–943.
- (6) Li, K.; Fang, H.; Duan, X.; Deng, D. Efficient Uptake of NH<sub>3</sub> by Dual Active Sites NH<sub>4</sub>SCN-Imidazole Deep Eutectic Solvents with Low Viscosity. *J. Mol. Liq.* **2021**, *339*, 116724.
